# Supplementary material for: Mechanisms of destructing translational domains in passive margin salt basins: Insights from analogue modelling
Source: Copernicus journal article supplement (doi:10.5194/se-2019-2), 2019-01-14
Supplement: Supplementary file [file se-2019-2-AC1-supplement.pdf]

# Overprinting translational domains in passive margin salt basins: Insights from analogue modelling

Zhiyuan Ge<sup>1\*</sup>, Matthias Rosenau<sup>2</sup>, Michael Warsitzka<sup>3,2</sup> and Rob L. Gawthorpe<sup>1</sup>

<sup>1</sup> Department of Earth Science, University of Bergen, Allégaten 41, 5007 Bergen, Norway

5 <sup>2</sup> Helmholtz Center Potsdam, German Research Center for Geosciences - GFZ Potsdam, Germany

<sup>3</sup> Institute of Geophysics of the Czech Academy of Sciences, Boční II/1401, 141 31 Prague 4, Czech Republic

*Correspondence to:* Zhiyuan Ge (Zhiyuan.Ge@uib.no)

10 **Abstract.** Current [conceptual models of gravitational tectonics](#) illustrating the structural style of passive margin salt basins typically [depict](#) domains of upslope extension and corresponding downslope contraction, separated by a domain of rather undeformed mid-slope translation. However, such a translational domain is rarely observed in natural systems where extensional and contractional structures may interfere in the mid-slope area. In this study, we use sandbox analogue  
15 modelling analysed by 4D digital image correlation (DIC) to investigate how the pre-kinematic layer thickness, differential sediment loading and sedimentation rate control the structural evolution of translational domains. As in nature, experimental deformation is driven by slowly increasing gravitational forces associated with continuous basal tilting. The results show that a translational domain persists throughout the basin evolution when the pre-kinematic layer is  
20 evenly distributed, although a thin (1 mm in the experiment, 100 m in nature) pre-kinematic layer can render the translational domain relatively narrow when comparing to settings with a thicker (5 mm) pre-kinematic layer. In contrast, early differential sedimentary loading in the mid-slope area creates minibasins [separated](#) by salt diapirs overprinting the translational domain. Similarly, very low sedimentation rate (1 mm per day in the experiment, equates to < 17 m/Ma in nature) in the  
25 early stage of the experiment results in an immature translational domain quickly overprinted by downslope migration of the extensional domain and upslope migration of the contractional domain. Our study suggests that the architecture of passive margin salt basins is closely linked to the sedimentary cover thickness and sedimentation pattern. The translational domain, as an unformed region in the supra-salt cover, is likely a transient feature in nature and [overprinted](#) in passive  
30 margins with either low sedimentation rate or a heterogeneous sedimentation pattern.

**Keywords** translational domain, thin-skinned, salt tectonics, passive margin, analogue modelling, digital image correlation (DIC)

## 1. Introduction

In passive margin basins containing syn- and post-rift salt deposits, salt tectonics generally have significant influences on structural style and stratigraphic architecture (e.g. Rowan, 2014). As the margins tilt due to thermal subsidence or seaward progradation of sedimentary wedges, passive margin salt basins often experience deformations related to gravitational failure (e.g. Brun and Fort, 2011; Rowan et al., 2004). Such gravitational failure is typically depicted as a linked system of upslope extension and downslope contraction enclosing a more or less undeformed translational domain, using the salt beneath as a detachment layer (Fig. 1a) (Brun and Fort, 2011; Cramez and Jackson, 2000; Dooley et al., 2017; Fort et al., 2004a; Rowan et al., 2004).

While the translational domain has received limited attention so far, the extensional and contractional domains have been studied extensively. For example, numerous studies have focused on structural style and kinematic evolution of rotated fault blocks (Mauduit et al., 1997), rollovers (Kr zsek et al., 2007; Mauduit and Brun, 1998) and extensional diapirs (Koyi, 1998; Vendeville and Jackson, 1992a, b) in the extensional domain, and folds and thrusts (Duffy et al., 2018; Fort et al., 2004a; Rowan et al., 2004), salt nappes and canopies (Hudec and Jackson, 2009, 2004; Masrouhi et al., 2013; Rowan et al., 2004) in the contractional domain. Conceptual models of salt-bearing passive margins commonly reduce the translation domain to a rather passive region of the cover strata, which widely remains undeformed during basin wide gravitational gliding and spreading (Fig. 1a) (e.g. Adam et al., 2012a; Dooley et al., 2017; Fort et al., 2004a). However, sub-surface data lacks evidences of such a clear undeformed translational domain in most passive margin salt basins, such as those in the West Africa and Brazilian margins (Fig. 1b and c). To our best knowledge, only one study so far has interpreted a typical translational domain based on 2D regional seismic analysis (Gradmann et al., 2005). However, this interpretation has been challenged by more recent, high quality 2D and 3D seismic analysis, suggesting widespread faulting in the translational domain (Gvirtzman et al., 2015). Instead, most passive margin salt basins have typical structures of minibasins and salt diapirs in the mid-slope area (Fig. 1b and c). Recent studies have shown that base-salt relief can initiate extensional and contractional structures as well as ramp syncline basins in the mid-slope therefore modify the translational domain (e.g. Dooley et al., 2017; Dooley et al., 2018; Ferrer et al., 2017; Pichel et al., 2018). However, in basins where pre-salt relief is limited or very gentle (e.g. Fig. 1b and c), such as the Lower Congo Basin, other mechanism may be responsible for overprinting the translational domain.

The concept of a translational domain is rather loosely defined because it has both structural and kinematic meanings. When used as a term describing the basin-wide structural partitioning, the

translational domain usually indicates an area located between the upslope extensional and downslope contractional structures (e.g. Fig. 1a). For example, when describing the structural character of the Lower Congo Basin, Rowan (2014) used the term of translational domain to indicate the mid-slope area of salt minibasins and diapirs. Yet many diapirs and minibasins in the mid-slope have an extensional or contractional origin, due to the down- and up-slope migration of extensional and contractional domains, respectively (Brun and Fort, 2011; Fort et al., 2004a). When one refers to the kinematic behaviour of the salt basin, the translational domain means a zone within the salt basin that is transferring the deformation without being internally deformed (e.g. Adam et al., 2012a). In this sense, the translational domain may not be part of the final basin architecture, but only present during the basin evolution. To avoid any confusion, we refer the translational domain here satisfying two criteria, i.e. being a largely undeforming (at least transiently) area and connects upslope extension and downslope contraction.

In this study, we aim to investigate the structural evolution of the passive margin's mid-slope area and the origin of a translation domain in a salt basin setting. Using sandbox modelling combined with quantitative surface deformation monitoring by means of 4D (3D plus time) DIC (digital image correlation), we demonstrate how the translation domain originates and evolves and investigate possible mechanisms on how it can be modified during ongoing gravitational deformation. Specifically, we focus on the influences of pre-kinematic layer thickness, differential sedimentary loading and sedimentation rate on the structural evolution of the translation domain. Furthermore, we investigated the overall evolution of different kinematic domains to understand the complexity of kinematic domains and how they develop through time and space.

## 2. Analogue modelling methods

Analogue experiments of gravitationally driven salt tectonic processes using analogue materials, such as quartz sand and silicone oil, have been traditionally employed to gain insight into thin-skinned salt tectonics (e.g. Ge et al., 1997; Mauduit and Brun, 1998; Mauduit et al., 1997; Rowan and Vendeville, 2006; Vendeville and Jackson, 1992b), as well as basin-scale geometry and evolution (e.g. Adam and Krezsek, 2012; Fort et al., 2004a). Quartz sand is suitable to model the supra-salt cover sediment due to its brittle behaviour. Similarly, silicone oil and salt both behave in a viscous manner in model and nature, respectively. In the last decade, the advent of quantitative and high resolution "4D" (three spatial dimensions plus time) DIC (digital image correlation) based deformation monitoring techniques, which record time series of incremental experimental surface deformation, allows the analysis and reconstruction of the kinematic evolution of basin-

wide structures in [great](#) detail and accuracy (e.g. Adam et al., 2012a; Adam and Krezsek, 2012; Dooley et al., 2018; Warsitzka et al., 2015).

## 2.1 Rock analogue materials

In this study, we use [a mix of](#) granular materials to simulate the brittle sediment layer cover and PDMS (polydimethylsiloxane) silicone oil to represent the viscous salt underneath ([e.g. Weijermars et al., 1993; Withjack and Callaway, 2000](#)). The density contrast between commonly used pure quartz sand and silicone [oil](#) in analogue modelling is generally too high when comparing to natural prototypes (Allen and Beaumont, 2012). In unison with other studies (Adam et al., 2012a; Dooley et al., 2007), we hereby use a mixture of quartz sand (G12, grain size: <400  $\mu\text{m}$ , [Rosenau et al., 2018](#)) and foam glass spheres (company: LIAVER, grain size: 250–500  $\mu\text{m}$ , [Warsitzka et al., 2019](#)) to adjust the density ratio between the cover layer and silicone. The weight ratio for a mixture of sand and foam glass sphere is 3:1 and the resulted mixture density is 1.13  $\text{g}/\text{cm}^3$  after sieving. The resulting density ratio between the granular mixture and silicone is 1.16, which is representative for a density ratio between cover sediments and underlying salt (e.g. Adam et al., 2012a; Allen and Beaumont, 2012; Warsitzka et al., 2015).

The frictional properties of the granular mix are similar to pure [quartz](#) sands used in analogue modelling (e.g. Klinkmüller et al., 2016). Static and sliding friction coefficients of the granular mixture are about 0.7 and 0.55, respectively, and cohesion is in the order of few tens of Pa as determined [by](#) using a ring shear tester (Warsitzka et al. (2019)). The silicone [oil](#) used in the experiments (Bayer Korasilon G30M) has a density of 0.97  $\text{g}/\text{cm}^3$  at [room](#) temperature of 23°C with a Newtonian viscosity of about  $2 \times 10^4$  Pa s at shear rates below  $10^{-1} \text{s}^{-1}$  (Rudolf et al., 2016). [All material properties are reported in Table 1.](#)

## 2.2 Model scaling

Adequate scaling of the analogue model from the natural prototype allows a direct comparison between the model and the natural prototype in terms of geometry, kinematic evolution as well as the deformation driving and resisting forces (e.g. Costa and Vendeville, 2002; Hubbert, 1937; Ramberg, 1981). Based on dimensionless numbers representing ratios of forces, scaling factors for the basic dimensions of length, mass and time are derived. Here we use the ratio  $\Gamma$  of lithostatic pressure vs. cohesion ( $C$ )

$$\Gamma = \rho g l / C \tag{1}$$

where  $\rho$ ,  $g$ ,  $l$  are density, gravitational acceleration and length, respectively, to scale the brittle regime and the ratio between lithostatic pressure and viscous strength (the so-called Ramberg Number  $Ra$ )

$$Ra = \rho g l^2 / \eta v \quad (2)$$

5 where  $\eta$  and  $v$  are dynamic viscosity and velocity, respectively, to scale the viscous regime (e.g. Adam and Krezsek, 2012; Gemmer et al., 2005). Keeping  $\Gamma$  and  $Ra$  the same in the model and the natural prototype ensures geometric, kinematic and dynamic similarity between the analogue model and its natural prototype (e.g. Costa and Vendeville, 2002; Hubbert, 1937; Ramberg, 1981) and allows the derivation of scaling factors for all relevant dimensions and parameters. Among the  
10 scaling factors, the geometric ( $l^*$ ) and time ( $t^*$ ) scaling factors, where  $*$  marks the ratios of model vs. natural prototype values, are particularly important to understand the model design and interpretation. From equations (1) and (2), it follows that for brittle-viscous models, the time scale depends directly on the initial choice of length scale, density and viscosity:

$$t^* = \rho^* g^* l^* / \eta^* \quad (3)$$

15 In this study, the geometric scaling bounded by the cohesion and densities of the rock analogue versus rocks, is chosen as  $l^* = 10^{-5}$  (1 cm in model is 1 km in nature). The time scaling, dictated then by the effective density (i.e. reduced by the water density for submarine systems) of sediments and the viscosity of natural salt versus silicone oil and strain rate, is consequently  $t^* = 4.255 \times 10^{-10}$  (4 hours in the model is approximately 1 Ma in nature). Table 1 summarizes the scaling relations  
20 and derived scaling factors for all relevant parameters.

### 2.3 Experimental setup and model design

As this study aims to understand kinematic domain partition and evolution in passive margin salt basin, the overall setup of the apparatus shares the characteristics of earlier studies (Fig. 2) (e.g. Adam et al., 2012a; Brun and Fort, 2004; Fort et al., 2004a). A flat rigid base of 1 m wide and 1.8  
25 m long is covered by a basal sand layer with a double-wedge shape which serves as a mould for the basin fill akin to passive margin basins (Brun and Fort, 2011, 2012). The two wedges are 65 cm and 25 cm in length respectively (Fig. 2a). In each experiment, we run two independent models. To realize this, two basins, each 35 cm wide (35 km in nature) and 90 cm long (90 km in nature), are built on the wedges separated by a 4 cm wide sand wall in between and bounded by two 3 cm  
30 wide sand walls on the outside boundaries (Fig. 2a). The basin depth is 2 cm at the basin's deepest location and pinches out towards the basins margins (Fig. 2a). The tilting of the entire base and

model towards the steeper basin side is driven by a computer-controlled stepper motor at a continuous rate of  $1^\circ$  /day ( $0.17^\circ$ /Ma) (Fig. 2b). Importantly, no deformation occurs within or at the base of the basal sand wedges during the experiment.

5 After basin construction, it is filled with silicone and once the silicone is free from air bubbles and has a flat upper surface, a pre-kinematic layer of the quartz sand – foam glass beads mixture is sieved onto the model surface. Then, tilting is started at the rate of  $1^\circ$  per day until reaching a final tilting of  $3.5^\circ$  after 84 hours (three and half days or 21 Ma in nature). Subsequently, the experiment continues for another 36 hours under static conditions to observe basin evolution under static, tilted conditions. The total running time is consequently 5 days or 120 hours, which equals 10 to approximate 30 Ma in the natural prototype (Appendix Table A1). During the experiment, the granular material is added by sieving every 12 hours to simulate syn-kinematic sedimentation (Appendix Table A1). After the experiment, the model is sliced and photographed for cross section view.

Three experiments with two models each were carried out for the purpose of this study and 15 sedimentation patterns were varied for the two sub-silicone basins throughout the three experiments. We group the modelling results into two categories with Model A–D focusing on the effect of cover thickness and sedimentation rate and Model E and F emphasizing the role of minibasin loading on translational domain evolution:

1. Model A aims to establish a baseline for investigating the impact of sedimentation pattern and 20 rate on the evolution of the translational domain. In Model A, the pre-kinematic layer is 1 mm thick and further sedimentation is added every 12 hours with an overall wedge shape and 1 mm average thickness (Fig. 3a). We choose wedge shape sedimentation because upslope area tends to receive more sediment in passive margins. Moreover, when deformation occurs, creating extensional grabens or contractional folds, more materials are 25 added over structures with topographic reliefs to mimic natural sedimentation. And such sieving method is also applied for all other models.
2. Model B has the same syn-kinematic sedimentation rate as the Basin 1a, but with a pre-kinematic layer of 5 mm, in order to study the influences of pre-kinematic layer thickness on the translational domain evolution (Fig. 3b).
- 30 3. Model C investigates the translational domain development under reduced pre-kinematic layer thickness (0.5 mm) and sedimentation rate (0.5 mm per 12 hours) (Fig. 3c) comparing to Model A.

4. **Model D** has an even thickness of 1 mm for the pre-kinematic layer (Fig. 3d). Further sedimentation is only added **when necessary** to cover the **newly** exposed, reflective silicone surface during the experiment to allow the monitoring system to work properly (Appendix Table A2). Therefore, **Model D** has negligible syn-kinematic sedimentation and provides an extreme example of translational domain evolution with no significant influence from sedimentary differential loading.
5. **Model E** studies how differential loading influences the translational domain (Fig. 3e). Specifically, the pre-kinematic layer in Model E is 1 mm thick in average, but with a differential sedimentation pattern of 8 minibasins created by sieving. We sieve an extra layer of sand, up to 1 mm thicker than surrounding areas to create the minibasins. The minibasins are 3–4 cm wide with 6–7 cm gaps in between. The differential sieving continues for another three rounds before sieving shift to sedimentary wedges shape (Fig. 3e), because previous study has suggested that differential loading is more likely to dominate the thin-skinned deformation system during the early stages of basin evolution (Adam et al., 2012a). Minibasin spacing and dimensions are constrained by generalization of natural observations where they can be a few kilometres to tens of kilometres in diameter and intervened by salt diapirs of similar size (e.g. Cramez and Jackson, 2000; Hudec and Jackson, 2004; Marton et al., 2000).
6. **Model F** has both pre-kinematic layer (0.5 mm) and sedimentation rates (0.5 mm per sieving) reduced by a factor of two comparing to Model E (Fig. 3f). We only add three minibasins as differential loading in the upslope area, with similar geometries to those of Model E (Fig. 3f). The objective to test minibasin behaviours with thin cover thickness. Model F also serves as a comparison to Model 3 where no minibasin loading is introduced. The syn-kinematic differential sedimentation also continues for three sieving periods before wedge shaped syn-kinematic sedimentation is applied (Appendix Table A2).

## 2.4 Experimental monitoring

We apply state-of-the art strain monitoring methods using digital image correlation (DIC) to derive quantitative observational data from the experiments. The model surface is monitored by a stereoscopic pair of two digital 12-bit monochrome CCD cameras with 29 mega pixels (LaVision Imager X-Lite 29M) at a time interval of 100 s (0.01 Hz frequency). We attach the cameras and an light (LED) system to a frame moving with the base. Thereby only deformation with respect to the base is recorded, i.e. gravity gliding without interfering with the tilting motion. The recorded

stereoscopic images are processed with DIC techniques which allows deriving the surface topography and full three-dimensional incremental surface velocity field with high accuracy ( $\leq 0.1$  mm) (Adam et al., 2005).

We base our kinematic model analysis on incremental horizontal downslope displacements (or velocity,  $V_x$ ) reflecting gravitational collapse and vertical displacements (or velocity,  $V_z$ ) reflecting thinning, thickening and silicone flow. From the surface displacements, longitudinal strain ( $\epsilon_{xx}$ ) is derived. Finally,  $\epsilon_{xx}$  is extracted along the symmetry axis of the models (downslope) at 1 hour intervals and displayed in the form of space-time plots, here referred to as strain evolution (or strain rate) maps. DIC analysis allows us to quantitatively constrain and analyse the structural and kinematic evolution of the model at high spatial (resulting vector spacing about 1-2 mm, at a vector accuracy of few tens of microns) and sufficient temporal resolution (100 seconds). DIC data generated in this study are published open access in Ge et al. (2019).

### 3. Experimental observations and modelling results

To describe the model structural evolution both qualitatively and quantitatively, we use DIC-derived surface deformation data displayed as maps of surface incremental displacement ( $V_x$  and  $V_z$ ) and longitudinal strain ( $\epsilon_{xx}$ ), as well as strain evolution maps in combination with cross sections of the models. Representative incremental surface displacements and longitudinal strains from three intervals—25–36 hours (7–9 Ma in nature), 61–72 hours (16–18 Ma in nature) and 109–120 hours (28–30 Ma in nature)—represent snapshots of the surface deformation during early, intermediate and late stages of the experiments (e.g. Fig. 4). The strain evolution maps visualize the surface strain rate evolution in the centre of each silicone basin through time (e.g. Fig. 5a). The strain evolution maps are tied to the cross sections showing the exact location of the structures and their spatial and temporal evolution as seen at the model surface (e.g. Fig. 5a).

#### 3.1 Model A

In Model A, after the first period of syn-kinematic sieving, the silicon basin is dominated by gravity gliding with upslope extension and downslope contraction (Fig. 4a–c). In the early stage, a *c.* 10 cm wide belt with extensional grabens and diapirs occurs at the uppermost edge of the slope (Fig. 4a). Afterwards, the extensional domain continues to expand to the end of the experiment, reaching to over 20 cm wide (Figs 4b, c and 5a). Downdip, two significant thrusts and folds develop with an interval of *c.* 10 cm near the lowermost edge of the silicone basin ( $\epsilon_{xx}$  in Fig. 4a). In the mid stage (after 48 hours), the thrust belt shifts towards both upslope and downslope with



all thrust belts being active in the late stage ( $\epsilon_{xx}$  in Fig. 5a). The resulted translational domain is *c.* 45 cm long at the end of the experiment (Fig. 5a). Overall, the model shows a clear domain partitioning from extension through translation to contraction, as described in the classic conceptual model (Fig. 1a).

### 5 3.2 Model B

In Model B, with a thicker, 5 mm thick pre-kinematic cover, the model surface remains largely undeformed in the early stage as only a single extensional graben develops at the upslope edge and no visually resolvable contractional structures occur in the downslope ( $\epsilon_{xx}$  in Fig. 4d). However, the thick cove strata still drives the silicone flowing from the upslope to the downslope, leading to the uplift of the downslope area ( $V_z$  in Fig. 4b). Major deformation starts in the mid stage when extensional domain occurs in the upslope with *c.* 10 cm width (Fig. 4e). In the meantime, a thrust belt  $T_{b1}$  occurs *c.* 10 cm away from the basin edge in the downslope (Fig. 5b). In the late stage, as the extensional domain slowly expands to *c.* 15 cm wide, a frontal thrust  $T_{b2}$  occurs at the downslope edge of the silicone basin (Fig. 5b). However, as the front thrust  $T_{b2}$  is initiated, the early thrust  $T_{b1}$  gradually becomes inactive (Fig. 5b). The resultant translational domain of Model B is over *c.* 55 cm and large than that of Model A (Fig. 5a and b).

### 3.3 Model C

Model C has reduced pre-kinematic layer thickness (0.5 mm) as well as syn-kinematic sedimentation (0.5 mm per 12 hours) comparing to Model A, therefore the cover thickness of Model C is half as Model A at same stage during the experiment (Fig. 3c). The resulted domain evolution of Model C is also similar to Model A but with important variation. For extension, the extensional domain starts wider with over 20 cm in width and expands gradually to over 30 cm in the mid stage (Fig. 6a and b). The contractional domain initially starts with *c.* 10 cm wide near the downslope edge but migrates upslope to *c.* 40 cm after 72 hours. By the end of the experiment, the contraction reaches the extensional domain in the upslope (Fig. 7a), squeezing the early extensional structures and resulting in an overprinted translational domain (Fig. 7a).

### 3.4 Model D

Model D has the same pre-kinematic layer thickness (1 mm) as Model A (Fig. 3D). However, in Model D, there is no syn-kinematic sedimentation in the early stage and only negligible sedimentation afterwards (Appendix Table A1). In the early stage, the extensional structures are initiated in a wide area of *c.* 30 cm along dip and grow even larger to more than 40 cm in the mid

stage (Figs 6d and 7b). Contractural structures occur in an area of *c.* 20 cm along dip near the edge of the downslope (Fig. 7b). The contractional belt converges into an area of approximately 10 cm wide before the contraction migrates upslope after 72 hours (Figs 6f and 7b). Due to the thin cover layer in the mid-slope (~ 1 mm), the migration of the contractional domain towards upslope causes short-wavelength folding in the translational domain in the late stage (Figs 6f and 7b). At the end of the experiment, the contractional domain overlaps the previous extensional domain, causing squeezing of extensional diapirs and folding of the cover layer in the former translational domain (Fig. 7b).

### 3.5 Model E

Model E and F show considerable differences in structural style and evolution from other models due to different sedimentation patterns (Fig. 3e and f). In Model E, differential loading of the pre-kinematic layer and early syn-kinematic sieving (with 8 minibasins) results in a basin-wide imprint of minibasins downbuilding. The differential loading process is most prominent on the subsidence pattern during the early stage where thicker minibasin areas subside stronger than intervened regions (Vz in Fig. 8a). However, minibasin downbuilding only dominates the deformation for a very short period of 1 to 2 hours during which the minibasins extend and areas in between are affected by diapirism and contraction (Fig. 9a). Shortly afterwards, gravity gliding takes over as extension dominates the upslope and contraction dominates the downslope (Figs 8b and 9a). During the transition, the minibasin area (apart from Minibasin 1) are lack of internal deformation while the diapirs in between start to accommodate deformation in both extensional and contractional domains (Fig. 9c). In the mid and late stages, Model E develops similar surface pattern to Model A with clear domains of extension, translation and contraction (Fig. 9a).

### 3.6 Model F

Comparing to Model E, Model F has reduced pre-kinematic layer thickness and syn-kinematic sedimentation and only three minibasins created in the upslope (Fig. 3f). Differential loading dominates the upslope deformation briefly in the first 1–2 hours of Model E (Fig. 9b), similar to what is observed in Model F. However, since the minibasins are located only in the upslope area and the sedimentation rate is half of Model E, the imprint of minibasin downbuilding on the structural evolution is less significant comparing to Model E (Fig. 8d). For example, the early stage minibasins and diapirs formation preserved in the cross section are much smaller than similar structures in Model E (Fig. 9a). From 48 hours and onwards, the extensional domain dominates the upslope and continues to expand to over 30 cm wide (Fig. 9b). In the meantime, the

contractional domain in the downslope is characterized by continuous upslope migration of contraction (Fig. 9b). By the end of the experiment, the contractional structures interfere with early extensional structures, resulting in an overprinted translational domain (Fig. b).

## 4. Discussion

5 We used basin-scale sandbox analogue modelling to study the first order controls on origination, development and destruction of the translational domain in salt-bearing passive margin basins where the thin-skinned salt tectonics dominates the structural and stratigraphic evolution. Based on the analysis of temporal and spatial evolution of kinematic domains and individual structures, we identify the translational domain as a transient feature **modified** by two potential mechanisms:  
10 i) migration of extensional and contractional domains into a previous undeformed translational domain; ii) differential loading by sedimentation into minibasins that triggers salt-related structures, such as diapirs, from the beginning of basin evolution therefore prevents the formation of a tectonically stable translational domain.

### 15 **4.1 Control of pre-kinematic layer thickness and sedimentation pattern on formation of a translational domain**

Our modelling results are in good agreement with previous works where a translational domain is evident when a relatively thick and continuous homogeneous pre-kinematic layer exists (e.g. Dooley et al., 2018; Fort et al., 2004a). Translational domains have been observed with a pre-kinematic layer of even thickness in the order of 3–10 mm (300 to 1000 meters in nature) (Adam et al., 2012a; Adam and Krezsek, 2012; Fort et al., 2004a). Similar observations are derived from  
20 this study where about 50% of the basin length is occupied by the translational domains with **Model A and B** (Fig. 5). As noted by Brun and Fort (2012), the cover layer needs to be thick and strong enough to transfer the strain without deforming internally. In many analogue models, the total thickness of pre- and syn-kinematic layers is usually on the order of a few centimetres (e.g.  
25 Adam et al., 2012a; Fort et al., 2004a), which equals to a few kilometres in nature using a similar geometric scaling factor from this study (1 cm in model is 1 km in nature). According to our study, a 1 mm thick pre-kinematic layer and 2-3 mm sediment from syn-kinematic sedimentation (few hundreds of meters if scaled to nature) seems strong enough to form a stable translational domain  
30 **(c. 45 cm wide)** from beginning to end, such as in **Model A** (Figs 5a). **With a thicker cover, such as Model B (5 mm pre-kinematic layer), the translational domain gets even larger (c. 55 cm wide) due to stronger cover** (Fig. 5b).

## 4.2 Overprinting translational domains by deformation migration

Our study shows that a very thin supra-salt cover, combining a thin pre-kinematic layer with a very low sedimentation rate, allows the downslope migration of extensional domains and upslope migration of contractional domains, which ultimately leads to the overprint of the translational domain (Figs 7a and 10a). Specifically, in Model C, when the pre-kinematic layer is only 0.5 mm in the models (50 m in nature) and sedimentation is 1 mm/day (about 17 m per Ma in nature), the translational domain can be overprinted by the migration of extension and contraction towards the basin centre (Fig. 7a and b). This contrast to Model A and B (Fig. 5), as well as other studies with thick pre-kinematic or syn-kinematic layers (e.g. Adam et al., 2012a; Brun and Fort, 2004; Fort et al., 2004a), where the undeformed translation domains are either fully or partially preserved due to its thick cover, even under the influence of upslope migration of contraction. However, the simulated sedimentation rate of about 17 m/Ma in nature is extremely low comparing to salt basins where the typical sedimentation rate is in the order of 100 m/ Ma (Adam et al., 2012a; Adam and Krezsek, 2012). In general, such low sedimentation rates are more compatible with typical hemiplegic sedimentation rates of 2–20 m/Ma (Stow et al., 2001). This implies that our models including a very thin pre-kinematic layer and a very low sedimentation rate may be not archetypical passive margin salt basins where the terrigenous input is generally significant (e.g. Fig. 1b and c). Therefore, the first proposed mechanism for overprinting the translational domain by deformation migration might be active only in special geological settings where sediment supply is limited (Fig. 10a).

In some cases, when margin tilting is modified due to sub-salt related tectonics, deformation migration may also occur with thick supra-salt cover. A good example is the Kwanza Basin, Angola, where a major Miocene sub-salt uplift of the basin in the upslope leads to a reactivation of basin-wide thin-skinned deformation (e.g. Hudec and Jackson, 2004). The uplifted area has average cover thickness over 2 km and shows a downslope migration of extension (Hudec and Jackson, 2004; their fig. 9).

## 4.3 Overprinting translational domain by differential loading

A more plausible mechanism for overprinting translational domains suggested by our experiments is differential loading in the mid-slope (Fig. 10b). The basin-wide differential loading is applied in Model E (Fig. 9a), which results in the formation of minibasins and diapirs. Even though the differential loading only dominates the basin for a short early period (roughly 1.5 hours in the model or 0.375 Ma in nature), the translational domain is overprinted completely. Although the pattern of differential loading is idealized in the experiments as strings of minibasins, variation of

[sediment deposition occurs](#) in nature as natural sedimentary systems deliver variable sediment supply through alternating fairways resulting in different sediment thicknesses across the basin. For example, restorations of the earliest stratigraphic units in passive margin salt basins have always been patchy with various thicknesses in different locations (e.g. Adam et al., 2012b; Hudec and Jackson, 2004; Marton et al., 2000). Moreover, numerical simulation has demonstrated that such patchy pattern of minibasins intervened by salt diapirs can be simply formed by differential loading alone (Peel, 2014).

Since the scenario of early differential loading is more realistic than a thick and uniform supra-salt cover, the strain transfer from upslope extension to downslope contraction may not be through a simple translational domain as current models suggest (Figs 1a and 10c). The thick and strong minibasins and intervened weak diapirs form heterogeneities within the sediment cover and complicate the pattern of strain transfer. For example, the minibasins in [Model E](#) are translated individually and the diapirs in between accommodate the deformation (Figs 9c and 10d). In this way, the deformation partially transfers from the upslope extensional domain to the downslope contractional domain but is also partially accommodated by minibasin translation and diapir squeezing in the mid-slope (Fig. 10d). An undeformed translational domain therefore is not necessary to be present during the whole evolution of the passive margin salt basins. However, the strike orientations of minibasins and associated diapirs in this study are all perpendicular to the orientation of thin-skinned deformation. In reality, the diapirs with various orientations may connect to each other forming a network, as what has been observed in the northern Gulf of Mexico (e.g. Rowan and Vendeville, 2006). Consequently, during thin-skinned deformation, the associated strain distribution of diapirs may be more complex than our models suggest.

#### **4.4 Alternative mechanisms for [overprinting](#) translation domains**

Other mechanisms may also be responsible for the [overprint](#) or nonexistence of a well-defined translational domain. One potential mechanism is sub-salt step or relief associated with early tectonic activity in passive margin salt basins (Jackson and Hudec, 2005; Pichel et al., 2018). Analogue models with sub-salt steps/relief have demonstrated that these basement structures can cause strain localization of the supra-salt cover strata around them therefore complicating the structural style and [overprinting](#) the translational domain (e.g. Dooley et al., 2017; Dooley et al., 2018; Ferrer et al., 2017; Gaullier et al., 1993).

Moreover, progradational sedimentary wedges can also [overprint](#) the translational domain. [As the sedimentary wedges also generate extension and contraction in the upslope and downslope](#)

respectively, progradation of the sedimentary wedges thus forces the forward movement of the associated extensional and contractional domains. Consequently, the early formed translational domain is superimposed by late extensional structures (Brun and Fort, 2011; McClay et al., 1998; Vendeville, 2005). Furthermore, sediment progradation direction and rate may also have variations across the margin and further complex the process of translational domain overprinting (e.g. Brun and Fort, 2018; Fort et al., 2004b). Although progradational sedimentary wedge is also a type of differential loading, the absence of tilting makes such systems very different from the ones presented in this study. Future research thus is needed to fully understand the influences of sub-salt structures and progradational wedges on the development and destruction of translational domains.

## 5. Conclusions

Sandbox analogue modelling analysed by 4D digital image correlation (DIC) allows a thorough and precise analysis of kinematic domain partitioning, as well as structural evolution of a passive margin salt basin under different pre- and syn-kinematic sedimentation patterns.

Experiments with uniform pre-kinematic cover thickness show a typical domain partition of upslope extension compensated by downslope contraction with an intermediate translational domain. Under such circumstances, even very thin (1 mm or 100 m in nature) pre-kinematic cover is sufficient to generate the translational domain. However, the translational domain grows wider with a thicker cover.

We identify two scenarios in which the translational domain can be considered a transient feature deformed during basin evolution. First, when the initial cover layer is thin and sedimentation rate is low, upslope migration of the contractional domain overprints the translational domain. Second, when early differential sediment loading occurs in the mid-slope area, formation of minibasins intervened by diapirs also modify the translational domain.

A comparison between models and natural cases suggests that an undeformed translational domain seen in analogue models rarely occurs in nature. This seems to be related to the general implementation of a thick, mechanically stable (or rigid undeformable) cover layer in analogue models neglecting the subtle initial thickness variations likely presented in natural sedimentary systems. Low sedimentation rate required for the overprint of the translational domain through migration of extensional and contractional domains as suggested by our study is rare in natural passive margins. Based on our study, initial thickness variations within the cover creating

differential loading and causing translational domain to be [overprinted](#) through the formation of minibasins and diapirs seems to be a more viable mechanism in nature. [However, other factors, such as progradation of sedimentary wedges and sub-salt related deformation or relieves, can also be responsible for modifying the translational domain through domain migration and perturbing the strain distribution in the supra-salt cover strata.](#)

**Data availability.** The experimental data, along with analysis code, are available on the GFZ repository (Ge et al., 2019).

**Author contributions.** ZG, MR and RG designed the experiments. ZG and MW ran the experiments. ZG, MR and MW processed the data and did the strain analysis. All authors contributed to the writing of the manuscript.

**Competing interests.** The authors declare no conflict of interest.

## Acknowledgement

The project was supported by E.ON Stipendienfonds and 2018 TNA program of EPOS' Thematic Core Service Multi-scale Laboratories. ZG would like to thank Equinor for [sponsoring his postdoc at University of Bergen](#). We thank Frank Neumann and Thomas Ziegenhagen for construction of the experimental device as well as the whole laboratory team for scientific assistance. Danielle Howlett is thanked for remarks on an early version of the paper. [Frank Zwaan and Tim Dooley are thanked for their constructive reviews that improve the quality and clarity of the manuscript. We also thank editor Mark Allen for editing suggestions.](#) We thank GFZ Data Services for making the data underlying this study open accessible (Ge et al., 2019; Warsitzka et al., 2019).

## References

- Adam, J., Ge, Z., and Sanchez, M.: Post-rift salt tectonic evolution and key control factors of the Jequitinhonha deepwater fold belt, central Brazil passive margin: Insights from scaled physical experiments, *Mar. Pet. Geol.*, 37, 70–100, 2012a.
- Adam, J., Ge, Z., and Sanchez, M.: Salt-structural styles and kinematic evolution of the Jequitinhonha deepwater fold belt, central Brazil passive margin, *Mar. Pet. Geol.*, 37, 101–120, 2012b.
- Adam, J. and Krezsek, C.: Basin-scale salt tectonic processes of the Laurentian Basin, Eastern Canada: insights from integrated regional 2D seismic interpretation and 4D physical experiments, *Geological Society, London, Special Publications*, 363, 331–360, 2012.
- Adam, J., Urai, J. L., Wieneke, B., Oncken, O., Pfeiffer, K., Kukowski, N., Lohrmann, J., Hoth, S., van der Zee, W., and Schmatz, J.: Shear localisation and strain distribution during tectonic faulting—new

- insights from granular-flow experiments and high-resolution optical image correlation techniques, *J. Struct. Geol.*, 27, 283–301, 2005.
- Allen, J. and Beaumont, C.: Impact of inconsistent density scaling on physical analogue models of continental margin scale salt tectonics, *Journal of Geophysical Research: Solid Earth*, 117, 2012.
- 5 Brun, J.-P. and Fort, X.: Compressional salt tectonics (Angolan margin), *Tectonophysics*, 382, 129–150, 2004.
- Brun, J.-P. and Fort, X.: Growth of Continental Shelves at Salt Margins, *Frontiers in Earth Science*, 6, 2018.
- Brun, J.-P. and Fort, X.: Salt tectonics at passive margins: Geology versus models, *Mar. Pet. Geol.*, 28, 1123–1145, 2011.
- 10 Brun, J.-P. and Fort, X.: Salt tectonics at passive margins: geology versus models—Reply, *Mar. Pet. Geol.*, 37, 195–208, 2012.
- Costa, E. and Vendeville, B. C.: Experimental insights on the geometry and kinematics of fold-and-thrust belts above weak, viscous evaporitic décollement, *J. Struct. Geol.*, 24, 1729–1739, 2002.
- 15 Cramez, C. and Jackson, M. P. A.: Superposed deformation straddling the continental-oceanic transition in deep-water Angola, *Mar. Pet. Geol.*, 17, 1095–1109, 2000.
- Dooley, T. P., Hudec, M. R., Carruthers, D., Jackson, M. P. A., and Luo, G.: The effects of base-salt relief on salt flow and suprasalt deformation patterns — Part 1: Flow across simple steps in the base of salt, *Interpretation*, 5, SD1vSD23, 2017.
- 20 Dooley, T. P., Hudec, M. R., Pichel, L. M., and Jackson, M. P. A.: The impact of base-salt relief on salt flow and suprasalt deformation patterns at the autochthonous, paraautochthonous and allochthonous level: insights from physical models, Geological Society, London, Special Publications, 476, 2018.
- Dooley, T. P., Jackson, M. P. A., and Hudec, M. R.: Initiation and growth of salt-based thrust belts on passive margins: results from physical models, *Basin Res.*, 19, 165–177, 2007.
- 25 Duffy, O. B., Dooley, T. P., Hudec, M. R., Jackson, M. P. A., Fernandez, N., Jackson, C. A. L., and Soto, J. I.: Structural evolution of salt-influenced fold-and-thrust belts: A synthesis and new insights from basins containing isolated salt diapirs, *J. Struct. Geol.*, 114, 206–221, 2018.
- Ferrer, O., Gratacós, O., Roca, E., and Muñoz, J. A.: Modeling the interaction between presalt seamounts and gravitational failure in salt-bearing passive margins: The Messinian case in the northwestern Mediterranean Basin, *Interpretation*, 5, SD99-SD117, 2017.
- 30 Fort, X., Brun, J.-P., and Chauvel, F.: Salt tectonics on the Angolan margin, synsedimentary deformation processes, *AAPG Bull.*, 88, 1523–1544, 2004a.
- Fort, X., Brun, J. P., and Chauvel, F.: Contraction induced by block rotation above salt (Angolan margin), *Mar. Pet. Geol.*, 21, 1281–1294, 2004b.
- 35 Gaullier, V., Brun, J. P., Guerin, G., and Lecanu, H.: Raft tectonics: the effects of residual topography below a salt de´collement, *Tectonophysics*, 228, 363–381, 1993.
- Ge, H., Jackson, M. P. A., and Vendeville, B. C.: Kinematics and dynamics of salt tectonics driven by progradation, *AAPG Bull.*, 81, 398–423, 1997.
- Ge, Z., Rosenau, M., Warsitzka, M., Rudolf, M., and Gawthorpe, R. L.: Digital image correlation data from analogue modeling experiments addressing mechanisms of destructing translational domains in passive margin salt basins. GFZ Data Services, <http://doi.org/10.5880/GFZ.4.1.2019.001>, 2019.
- 40 Gemmer, L., Beaumont, C., and Ings, S. J.: Dynamic modelling of passive margin salt tectonics: effects of water loading, sediment properties and sedimentation patterns, *Basin Res.*, 17, 383–402, 2005.
- Gradmann, S., Hübscher, C., Ben-Avraham, Z., Gajewski, D., and Netzeband, G.: Salt tectonics off northern Israel, *Mar. Pet. Geol.*, 22, 597–611, 2005.
- 45 Gvirtzman, Z., Reshef, M., Buch-Leviatan, O., Groves-Gidney, G., Karcz, Z., Makovsky, Y., and Ben-Avraham, Z.: Bathymetry of the Levant basin: interaction of salt-tectonics and surficial mass movements, *Mar. Geol.*, 360, 25–39, 2015.
- Hoshino, K., Koide, H., Inami, K., Iwamura, S., and Mitsui, S.: Mechanical Properties of Tertiary Sedimentary Rocks under High Confining Pressure, Geological Survey of Japan, Kawasaki, Report, 244, 1972.
- 50 Hubbert, M. K.: Theory of scale models as applied to the study of geologic structures, *Bull. Geol. Soc. Am.*, 48, 1459–1520, 1937.
- Hudec, M. R. and Jackson, M. P. A.: Interaction between spreading salt canopies and their peripheral thrust systems, *J. Struct. Geol.*, 31, 1114–1129, 2009.
- 55



- Hudec, M. R. and Jackson, M. P. A.: Regional restoration across the Kwanza Basin, Angola: Salt tectonics triggered by repeated uplift of a metastable passive margin, *AAPG Bull.*, 88, 971–990, 2004.
- Jackson, M. P. A. and Hudec, M. R.: Stratigraphic record of translation down ramps in a passive-margin salt detachment, *J. Struct. Geol.*, 27, 889–911, 2005.
- 5 Jaeger, J. C. and Cook, N. G. W.: *Fundamentals of rock mechanics*. Methuen & Co Ltd., London, 1969.
- Koyi, H.: The shaping of salt diapirs, *J. Struct. Geol.*, 20, 321–338, 1998.
- Kr zsek, C., Adam, J., and Grujic, D.: Mechanics of fault and expulsion rollover systems developed on passive margins detached on salt: insights from analogue modelling and optical strain monitoring, Geological Society, London, Special Publications, 292, 103–121, 2007.
- 10 Lallemand, S. E., Schn rle, P., and Malavieille, J.: Coulomb theory applied to accretionary and nonaccretionary wedges: Possible causes for tectonic erosion and/or frontal accretion, *Journal of Geophysical Research: Solid Earth*, 99, 12033–12055, 1994.
- Marton, G., Tari, G. C., and Lehmann, C. T.: Evolution of the Angolan Passive Margin, West Africa, With Emphasis on Post - Salt Structural Styles, Atlantic rifts and continental margins, 2000. 129 – 149, 15 2000.
- Masrouhi, A., Bellier, O., Koyi, H., Vila, J.-M., and Ghanmi, M.: The evolution of the Lansarine–Baouala salt canopy in the North African Cretaceous passive margin in Tunisia, *Geol. Mag.*, 150, 835–861, 2013.
- Mauduit, T. and Brun, J. P.: Growth fault/rollover systems: birth, growth, and decay, *Journal of Geophysical Research: Solid Earth*, 103, 18119–18136, 1998.
- 20 Mauduit, T., Guerin, G., Brun, J.-P., and Lecanu, H. J. J. o. S. G.: Raft tectonics: the effects of basal slope angle and sedimentation rate on progressive extension, 19, 1219–1230, 1997.
- McClay, K. R., Dooley, T., and Lewis, G.: Analog modeling of progradational delta systems, *Geology*, 26, 771–774, 1998.
- Modica, C. J. and Brush, E. R.: Postrift sequence stratigraphy, paleogeography, and fill history of the deep-water Santos Basin, offshore southeast Brazil, *AAPG Bull.*, 88, 923–945, 2004.
- 25 Peel, F. J.: How do salt withdrawal minibasins form? Insights from forward modelling, and implications for hydrocarbon migration, *Tectonophysics*, 630, 222–235, 2014.
- Pichel, L. M., Peel, F., Jackson, C. A. L., and Huuse, M.: Geometry and kinematics of salt-detached ramp syncline basins, *J. Struct. Geol.*, 115, 208–230, 2018.
- 30 Ramberg, H.: Gravity, deformation, and the earth's crust: In theory, experiments, and geological application, Academic press, 1981.
- Rowan, M. G.: Passive-margin salt basins: hyperextension, evaporite deposition, and salt tectonics, *Basin Res.*, 26, 154–182, 2014.
- Rowan, M. G., Peel, F. J., and Vendeville, B. C.: Gravity-driven fold belts on passive margins, *AAPG Mem.*, 2004. 157–182, 2004.
- 35 Rowan, M. G. and Vendeville, B. C.: Foldbelts with early salt withdrawal and diapirism: Physical model and examples from the northern Gulf of Mexico and the Flinders Ranges, Australia, *Mar. Pet. Geol.*, 23, 871–891, 2006.
- Rudolf, M., Boutelier, D., Rosenau, M., Schreurs, G., and Oncken, O.: Rheological benchmark of silicone oils used for analog modeling of short-and long-term lithospheric deformation, *Tectonophysics*, 684, 12–22, 2016.
- 40 Schellart, W. P.: Analogue modelling of large-scale tectonic processes: an introduction. In: Analogue modelling of large-scale tectonic processes, Schellart, W. P. and Passchier, C. (Eds.), *Journal of Virtual Explorer*, 2002.
- 45 Stow, D. A. V., Huc, A. Y., and Bertrand, P.: Depositional processes of black shales in deep water, *Mar. Pet. Geol.*, 18, 491–498, 2001.
- Vendeville, B. C.: Salt tectonics driven by sediment progradation: Part I—Mechanics and kinematics, *AAPG Bull.*, 89, 1071–1079, 2005.
- Vendeville, B. C. and Jackson, M. P. A.: The fall of diapirs during thin-skinned extension, *Mar. Pet. Geol.*, 9, 354–371, 1992a.
- 50 Vendeville, B. C. and Jackson, M. P. A.: The rise of diapirs during thin-skinned extension, *Mar. Pet. Geol.*, 9, 331–354, 1992b.
- Warsitzka, M., Ge, Z., Sch nebeck, J.-M., Pohlenz, A., and Kukowski, N.: Ring-shear test data of foam glass beads used for analogue experiments in the Helmholtz Laboratory for Tectonic Modelling (HelTec)

- at the GFZ German Research Centre for Geosciences in Potsdam and the Institute of Geosciences, Friedrich Schiller University Jena. GFZ Data Services, <http://doi.org/10.5880/GFZ.4.1.2019.002>, 2019.
- Warsitzka, M., Kley, J., and Kukowski, N.: Analogue experiments of salt flow and pillow growth due to basement faulting and differential loading, *Solid Earth*, 6, 9–31, 2015.
- 5 Weijermars, R., Jackson, M. P. A., and Vendeville, B.: Rheological and tectonic modeling of salt provinces, *Tectonophysics*, 217, 143–174, 1993.
- Weinberger, R., Lyakhovsky, V., Baer, G., and Begin, Z. B.: Mechanical modeling and InSAR measurements of Mount Sedom uplift, Dead Sea basin: Implications for effective viscosity of rock salt, *Geochem. Geophys. Geosyst.*, 7, 1–20, 2006.
- 10 Withjack, M. O. and Callaway, S.: Active normal faulting beneath a salt layer: an experimental study of deformation patterns in the cover sequence, *AAPG Bull.*, 84, 627–651, 2000.

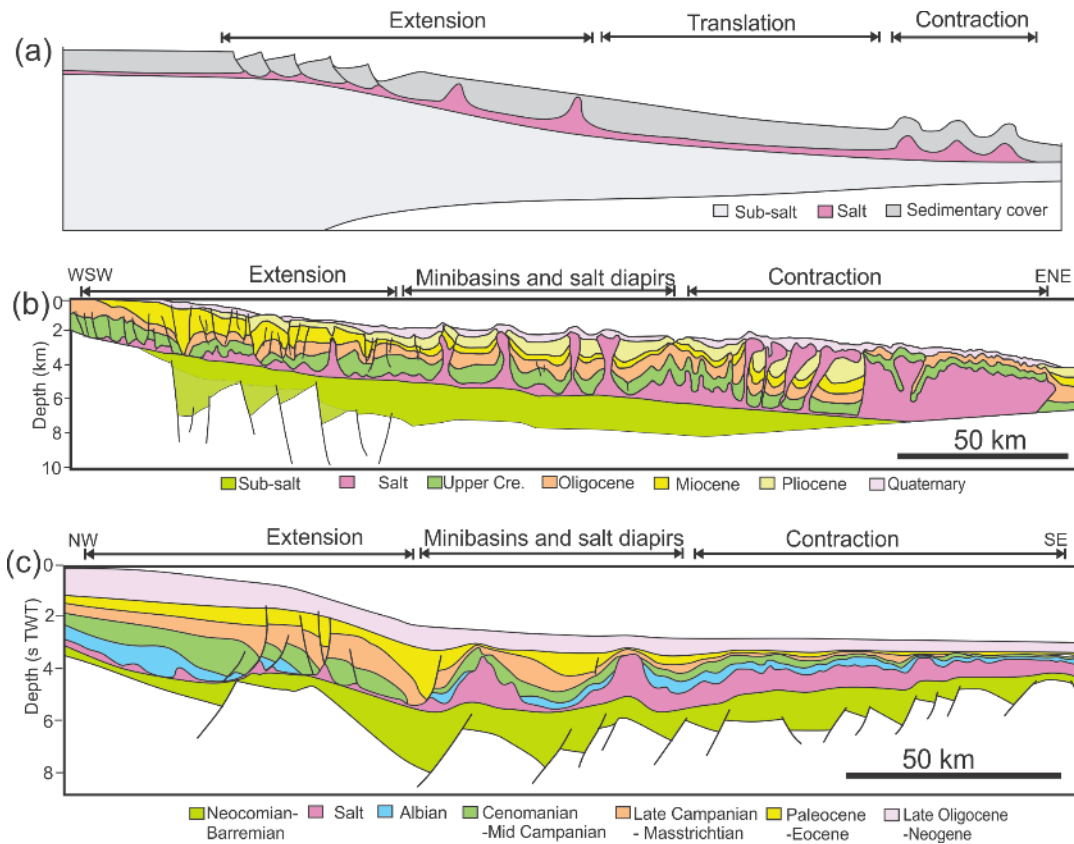

**Figure 1.** (a) Simplified cross section illustrating the kinematic domains and structural styles in a typical passive margin salt basin (modified after Rowan et al., 2004; Brun and Fort, 2011). (b) Regional interpreted seismic profile crossing the Lower Congo Basin (modified after Marton et al., 2000). Note the minibasins and diapirs in the mid-slope. (c) Regional interpreted seismic profile crossing the Central Santos Basin (modified after Modica and Brush, 2004). Note the large minibasin and diapirs in the mid-slope area.

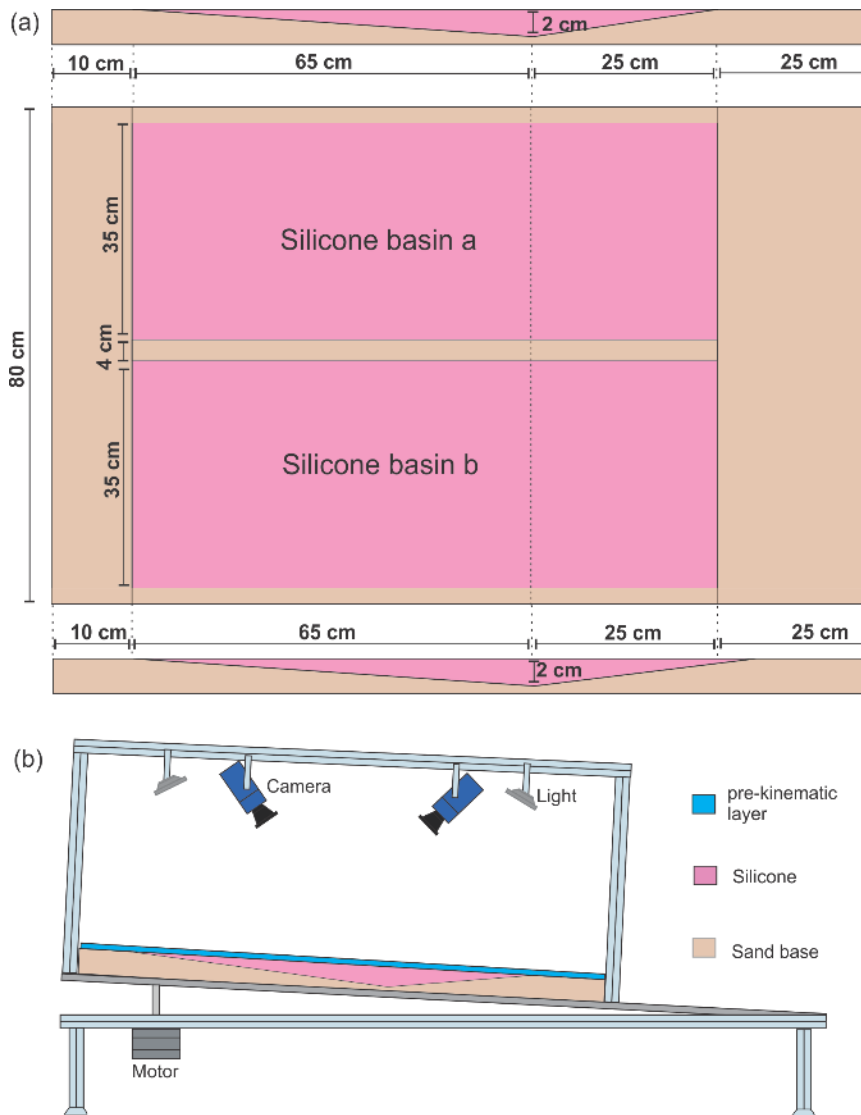

**Figure. 2.** Experimental setup and sketch of the apparatus. (a) Experimental setup including two identical silicone basins in each experimental run. The double wedge shape of the silicone basin is 2 cm at its thickest. (b) 2D sketch of the experimental setup. The cameras are attached to the tilting basal plate lifted by a stepper motor.

5

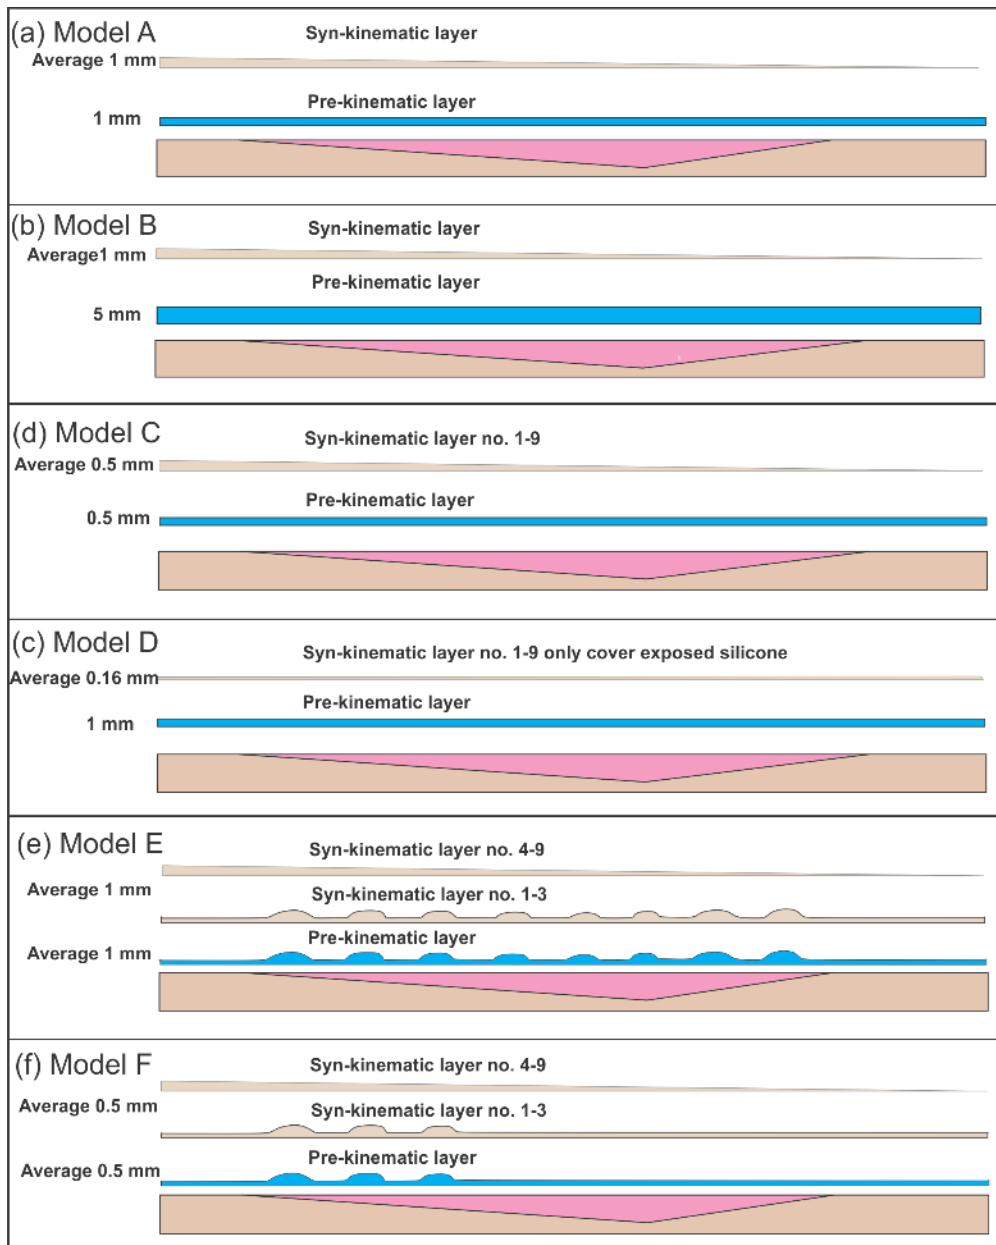

**Figure. 3.** Depositional scenarios for six models of the three experiments. The blue layers are pre-kinematic layer and brown layers are syn-kinematic. Note the minibasin shape associates with differential loading in Model E and F. The syn-sedimentation thickness is in average as they are in wedge shape but adjusted to structural relieves during the experiments.

5

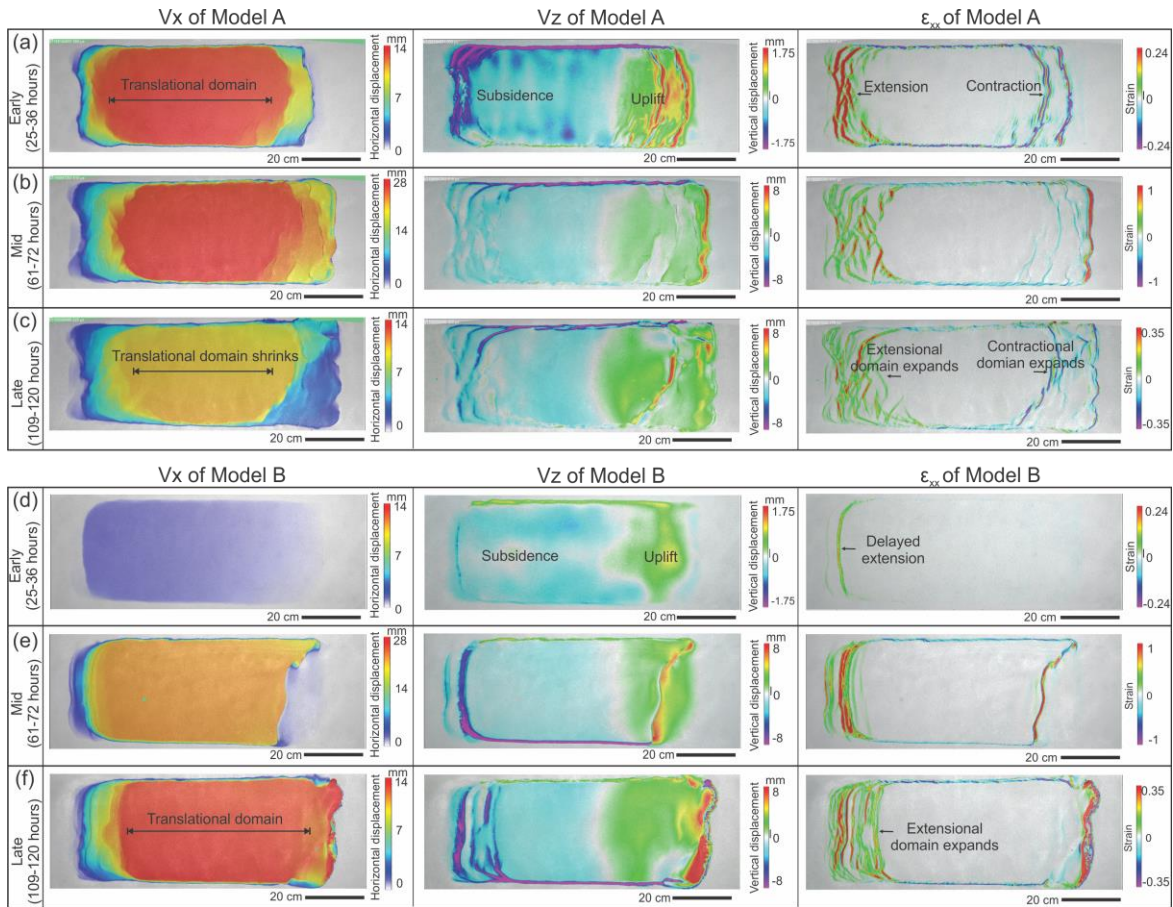

**Figure 4.** (a–c) Map view of **incremental horizontal and vertical displacement ( $V_x$ ,  $V_z$ )** and strain pattern ( $\epsilon_{xx}$ ) derived from 3D DIC strain data of Model A from the (a) early (25–36 hours), (b) mid (61–72 hours) and (c) late stages (109–120 hours). **Note the persistent translational domain throughout the experiment.** (d–f) Map view of incremental horizontal and vertical displacement ( $V_x$ ,  $V_z$ ) and strain pattern ( $\epsilon_{xx}$ ) of Model B from the (d) early (25–36 hours), (e) mid (61–72 hours) and (f) late stages (109–120 hours). **Note the delayed deformation and large translational domain in the model.** The horizontal displacement ( $V_x$ ) displays downslope displacement of the sedimentary cover (left to right in map view). The vertical displacement ( $V_z$ ) displays total subsidence and uplift. The horizontal strain ( $\epsilon_{xx}$ ) shows location of the extensional (red) and contractional (purple) structures.

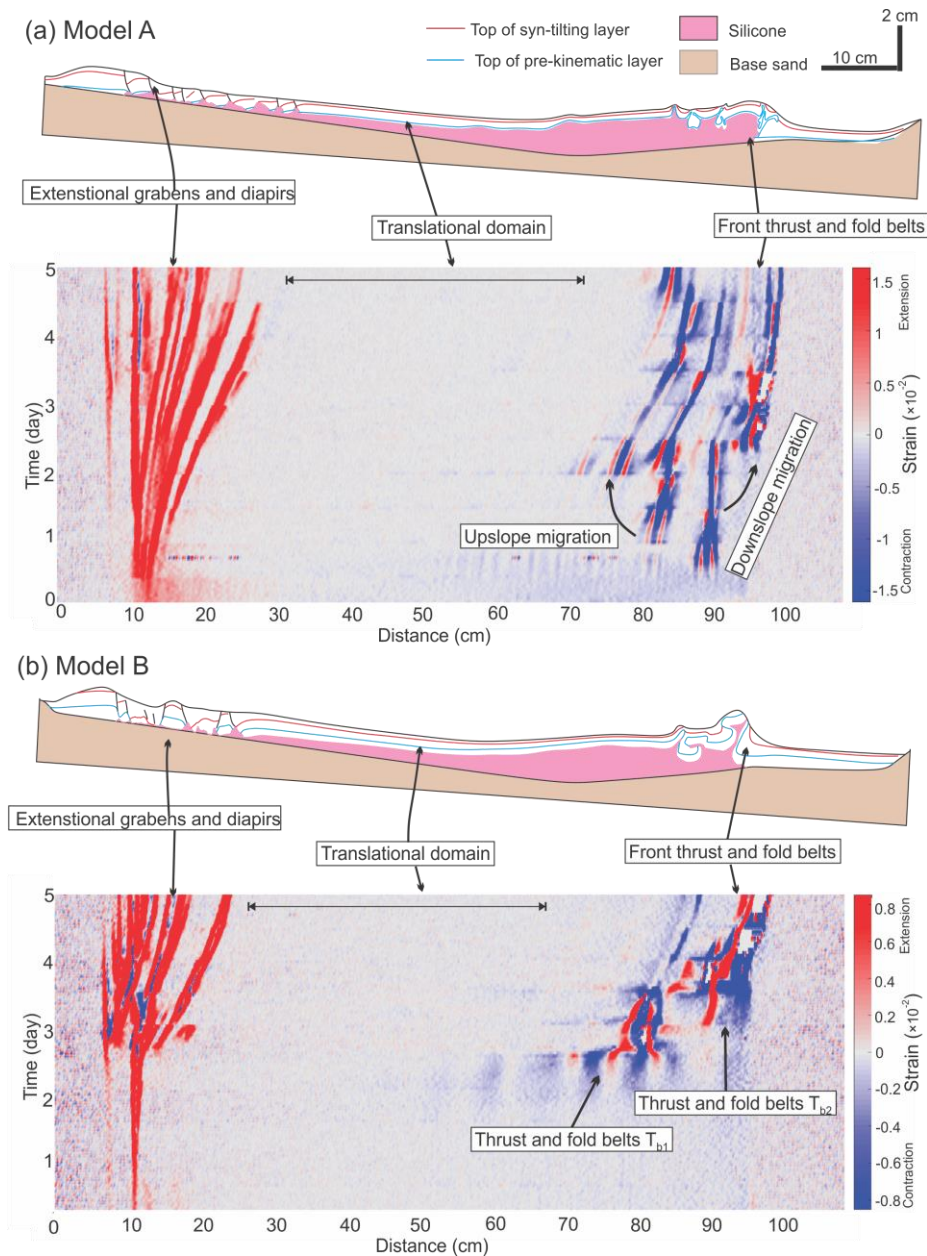

**Figure 5.** (a) Structural styles and kinematic domain partition in central section of **Model A**. The strain evolution map (showing incremental strain at 1 hour intervals, or strain rate in 1/h) along the central section beneath shows the initiation of extensional and contractional structures and how they evolve through time. Note the **persistent** translational domain. (b) Structural styles and kinematic domain partition in central section of **Model B**. The strain evolution map shows the evolution of extensional and contractional structures in the central section. Note the **first** contractional structure  $T_{b1}$  occurs in the mid stage during the experiment.

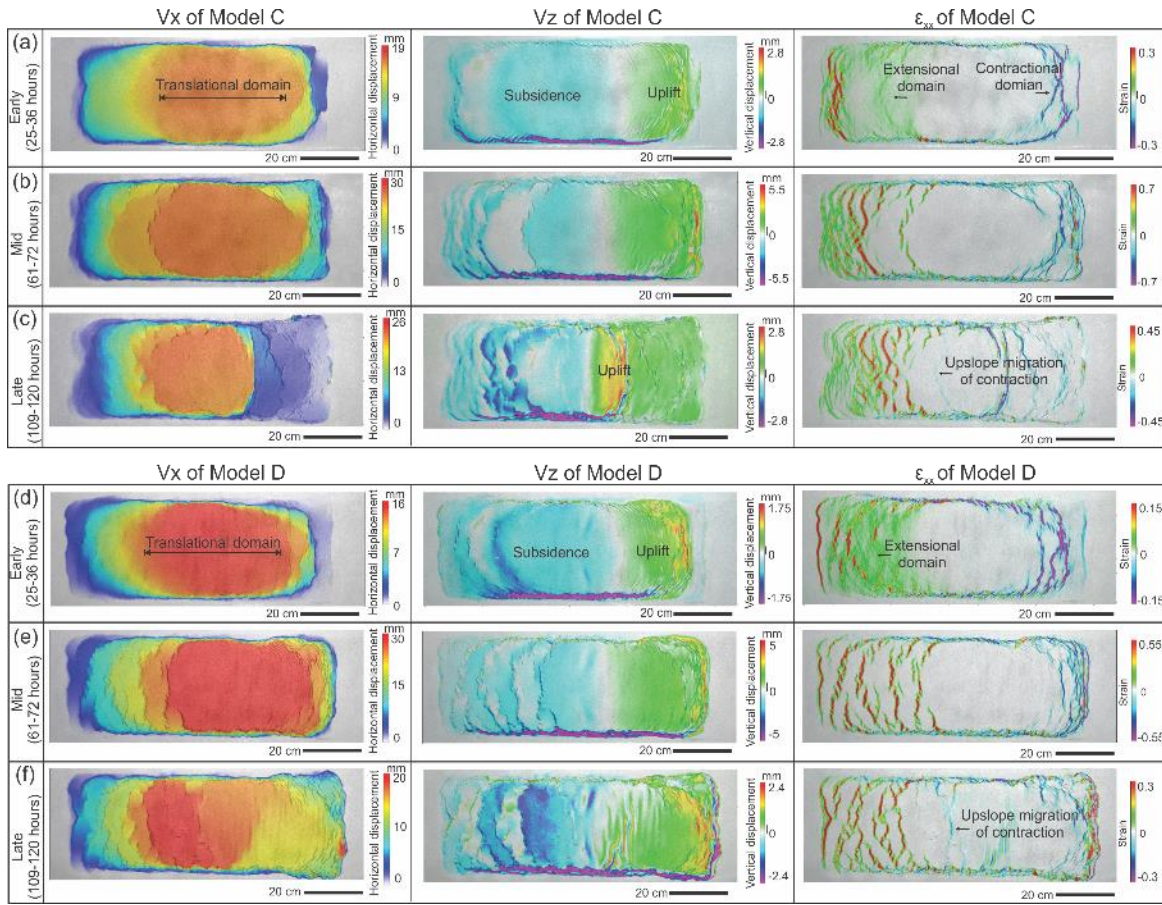

**Figure 6.** (a–c) Map view of incremental horizontal and vertical displacement ( $V_x$ ,  $V_z$ ) and strain pattern ( $\epsilon_{xx}$ ) derived from 3D DIC strain data of Model C from the (a) early (25–36 hours), (b) mid (61–72 hours) and (c) late stages (109–120 hours). Note the upslope migration of the translational domain and its overprint at the end of experiment. (d–f) Map view of incremental horizontal and vertical displacement ( $V_x$ ,  $V_z$ ) and strain pattern ( $\epsilon_{xx}$ ) of Model D from the (d) early (25–36 hours), (e) mid (61–72 hours) and (f) late stages (109–120 hours). Note the wide distributed deformation and overprinted translational domain. The horizontal displacement ( $V_x$ ) displays downslope displacement of the sedimentary cover (left to right in map view). The vertical displacement ( $V_z$ ) displays total subsidence and uplift. The horizontal strain ( $\epsilon_{xx}$ ) shows location of the extensional (red) and contractional (purple) structures.



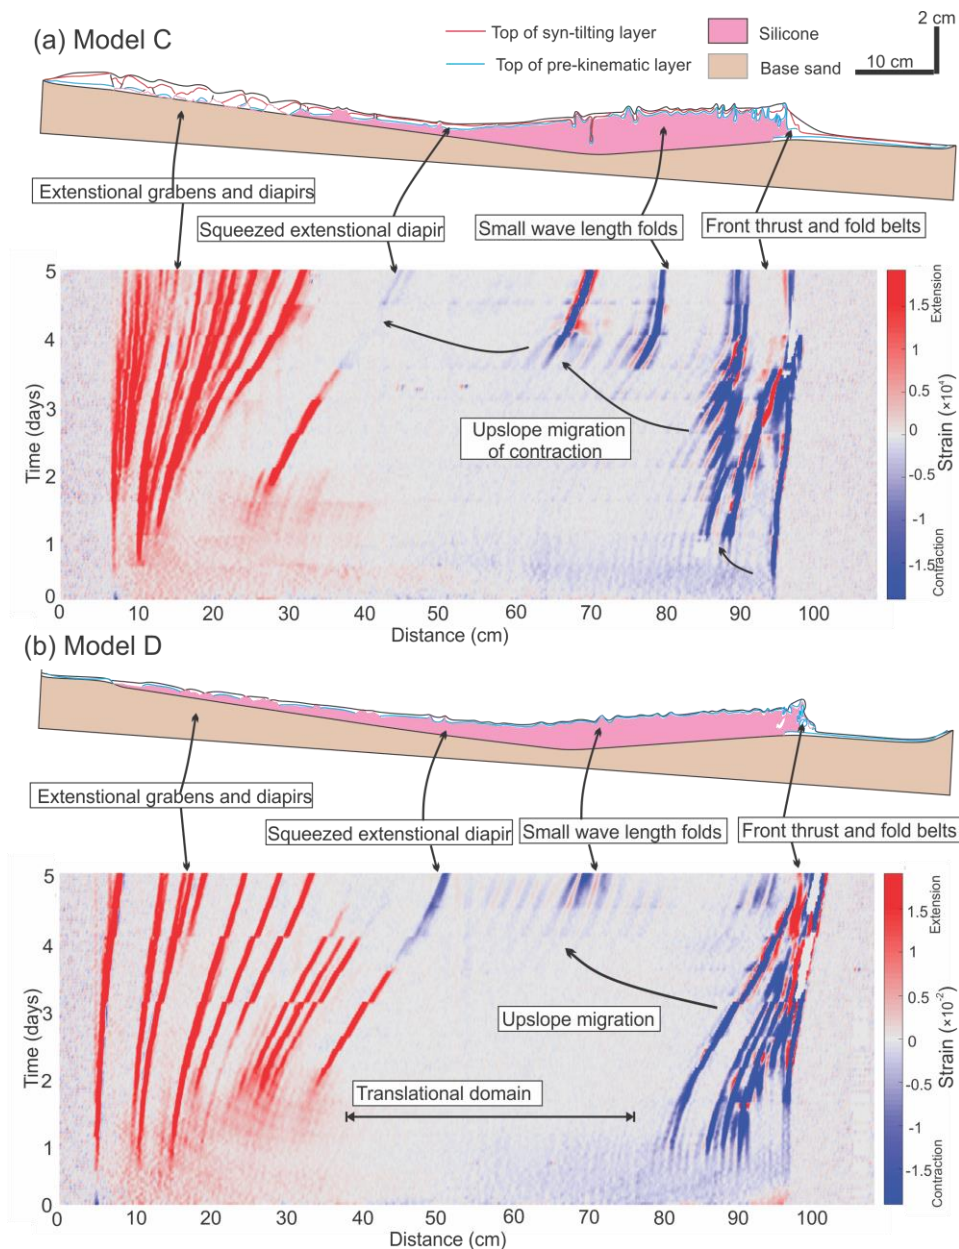

**Figure 7.** (a) Structural styles and kinematic domain partition in central section of **Model C**. The strain evolution map (showing incremental strain at 1 hour intervals, or strain rate in 1/h) along the central section beneath shows the initiation of extensional and contractional structures and how they evolve through time. Note the **squeezed diapir** due to the **upslope migration of contractional domain**. (b) Structural styles and kinematic domain partition in central section of **Model D**. The strain evolution map shows the evolution of extensional and contractional structures in the central section. **Note the overall kinematic and structural evolution of Model D are similar to Model A–C without differential loading of wedge shaped syn-kinematic sedimentation.**

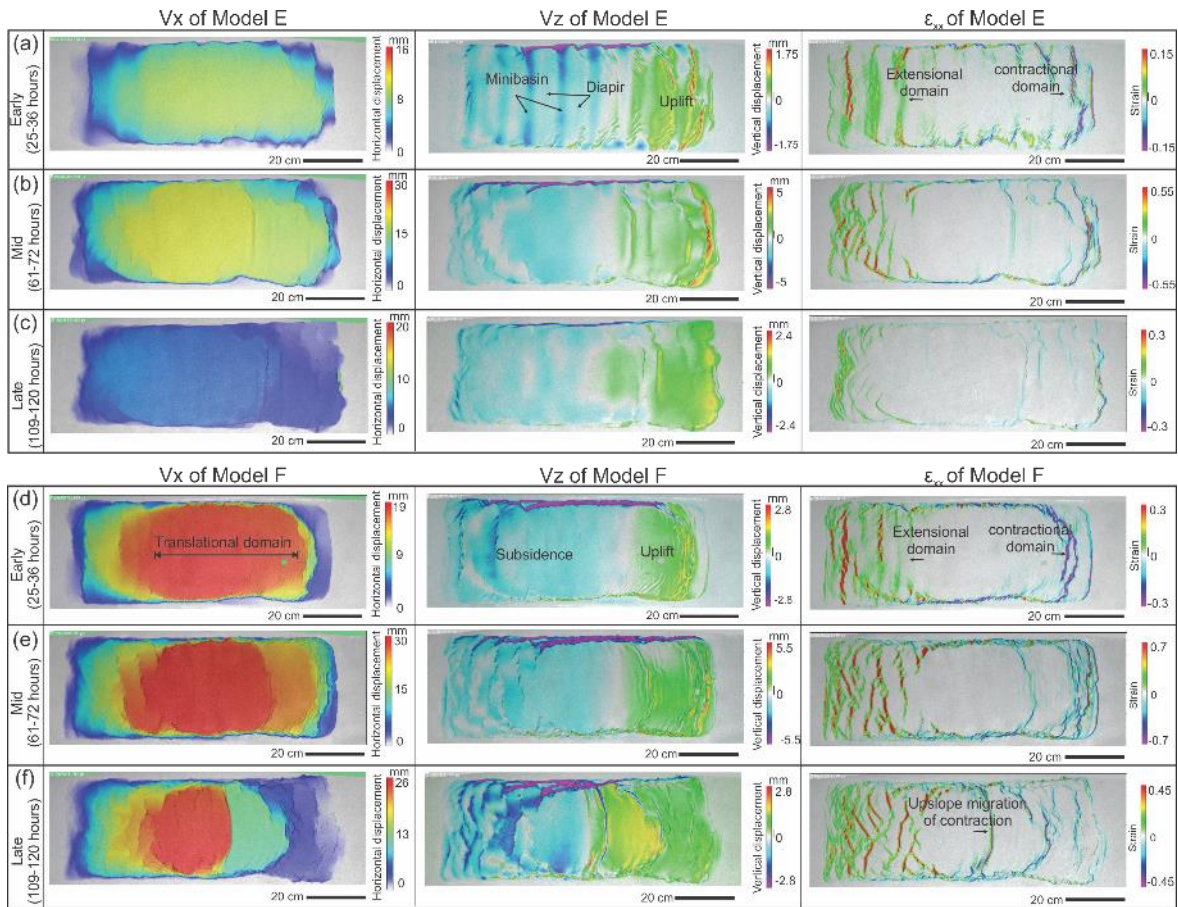

**Figure 8.** (a–c) Map view of incremental horizontal and vertical displacement ( $V_x$ ,  $V_z$ ) and strain pattern ( $\epsilon_{xx}$ ) derived from 3D DIC strain data of Model E from the (a) early (25–36 hours), (b) mid (61–72 hours) and (c) late stages (109–120 hours). Note the minibasins and diapirs formed in the early stage. (d–f) Map view of incremental horizontal and vertical displacement ( $V_x$ ,  $V_z$ ) and strain pattern ( $\epsilon_{xx}$ ) of Model F from the (d) early (25–36 hours), (e) mid (61–72 hours) and (f) late stages (109–120 hours). Note the overall similarity between Model F to Model C. The horizontal displacement ( $V_x$ ) displays downslope displacement of the sedimentary cover (left to right in map view). The vertical displacement ( $V_z$ ) displays total subsidence and uplift. The horizontal strain ( $\epsilon_{xx}$ ) shows location of the extensional (red) and contractional (purple) structures.

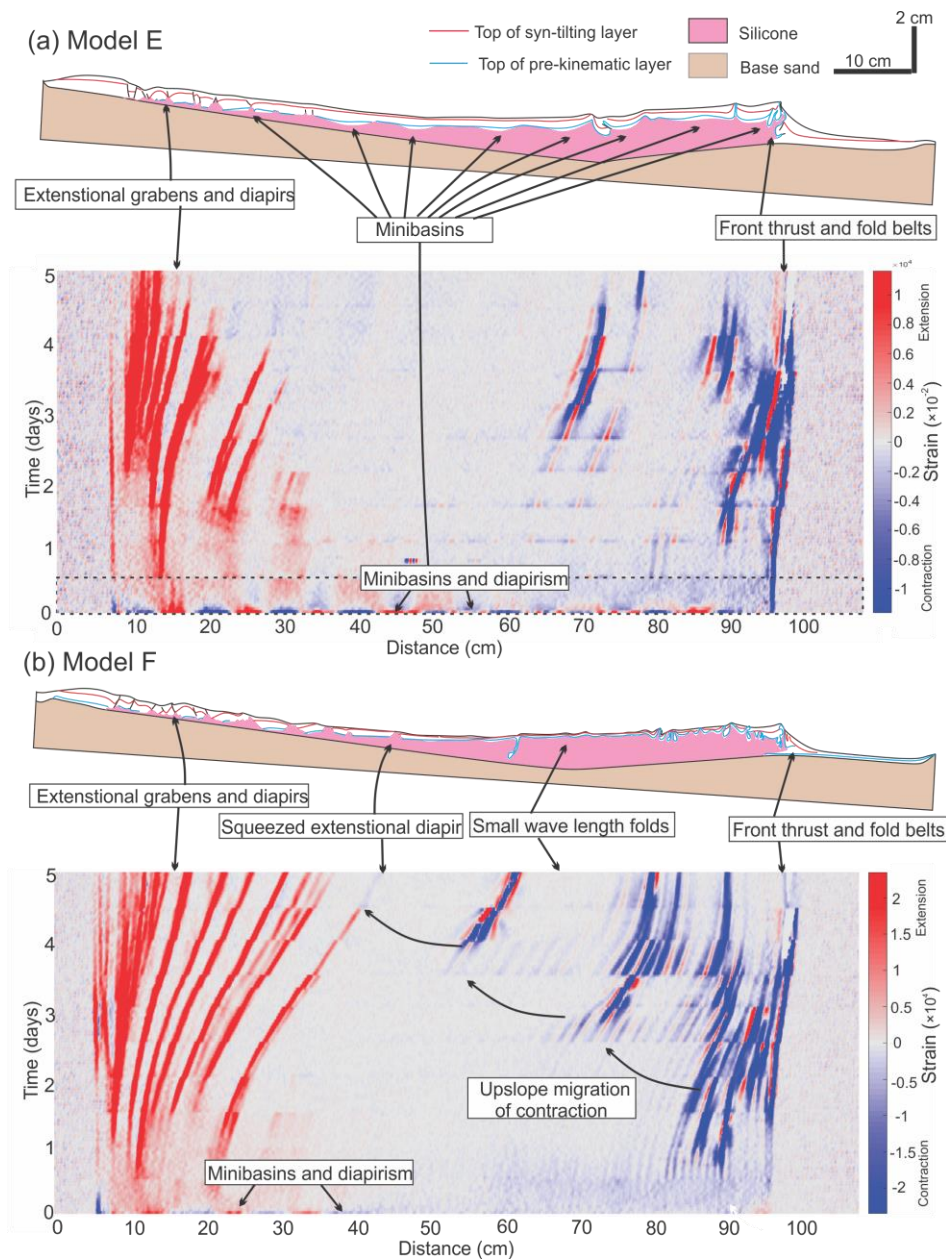

**Figure 9** (a) Structural styles and kinematic domain partition in central section of **Model E**. The strain evolution map (showing incremental strain at 1 hour intervals, or strain rate in 1/h) along the central section beneath shows the initiation of extensional and contractional structures and how they evolve through time. Note the early stage minibasin formation and diapirism and their imprints on the translational domain. (b) Structural styles and kinematic domain partition in central section of **Model F**. The strain evolution map shows the evolution of extensional and contractional structures in the central section. Note the early stage diapirism and upslope migration that partially overprints the translational domain and upslope migration of contraction.

10

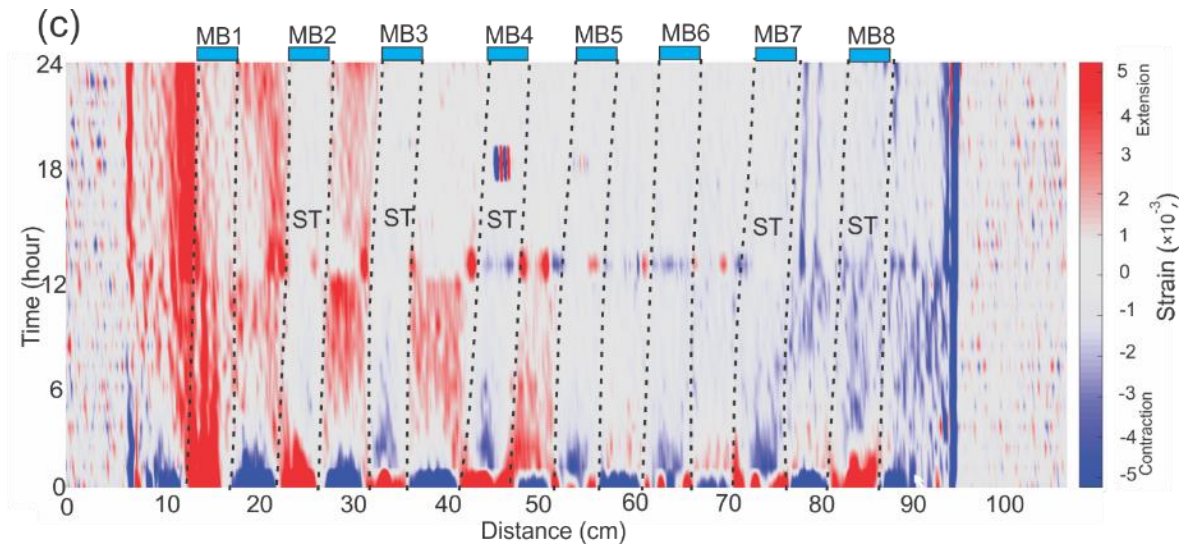

**Figure 9 continue. (c) Zoom into the strain evolution map** for the first 24 hours along mid cross section of **Model E**. The minibasins **gradually** change from areas of extension to zones that are relatively stable **in the first three hours**. MB means minibasin and ST means strain transfer. See Fig. 9a for the whole time interval of **the Model E**.

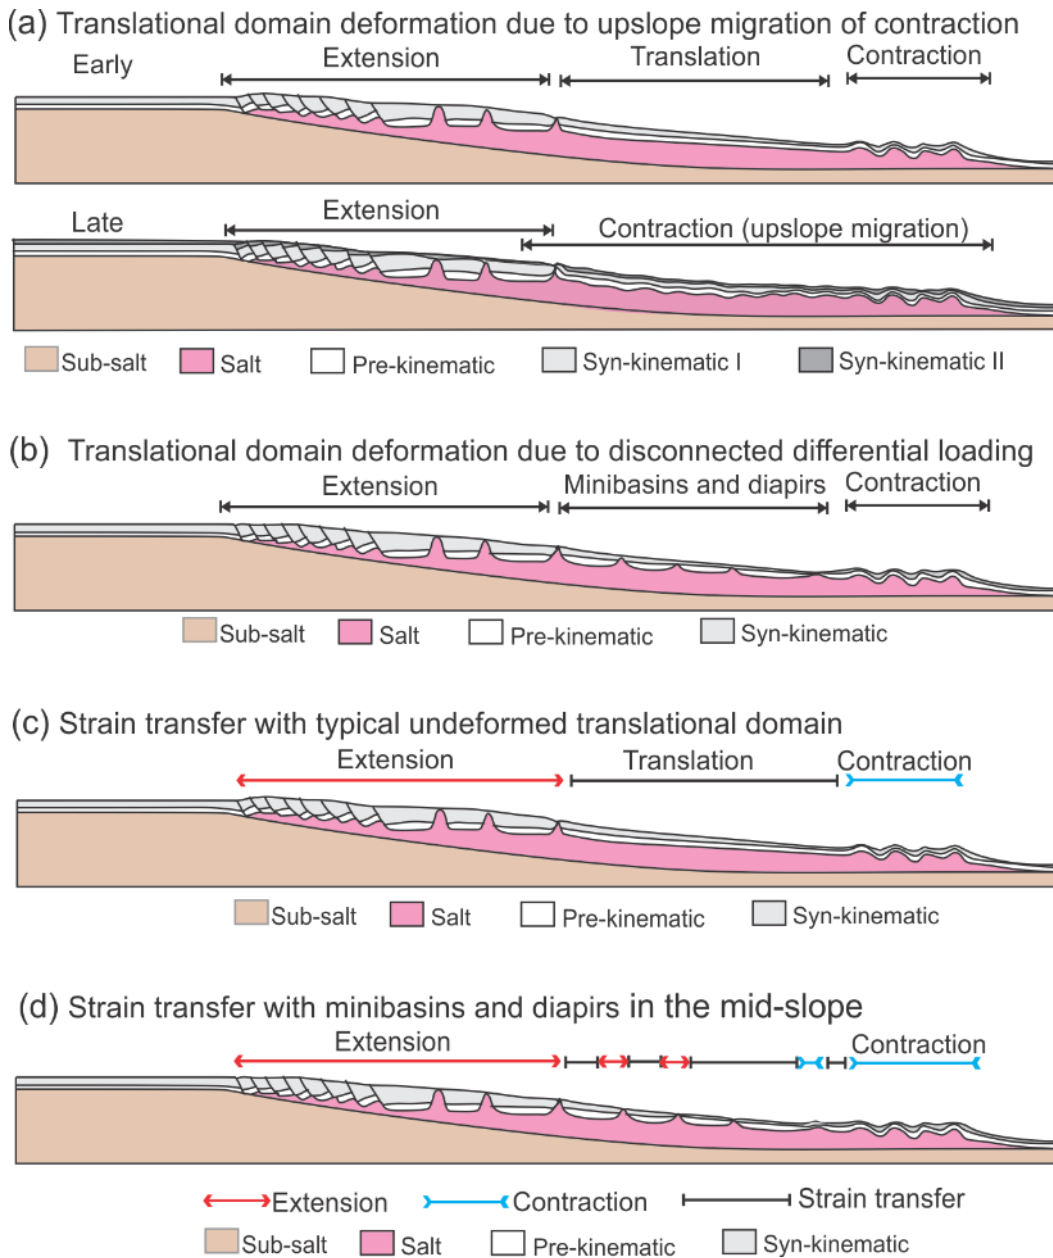

**Figure 10.** Proposed mechanisms of overprinting translational domains and models illustrating strain transfer with translational domain and minibasins with diapirs. (a) Low sedimentation rate and thin supra-salt cover allows upslope migration of contraction resulting in overprinting the translational domain. (b) Sedimentary differential loading leads to the development of minibasins and diapirs in the mid-slope preventing the establishment of a stable, undeformed translational domain. (c) The undeformed translational domain in the mid-slope allows strain transfer (ST) without significant internal deformation. (d) The minibasins and diapirs in the mid-slope allow strain transfer (ST) through a combination of movement of minibasin and minor stretching or squeezing of diapirs in between.

| Quantity             | Symbol            | Unit              | Value (model)                    | Value (prototype)       | Scaling relation                                                                           | Scaling factor         |
|----------------------|-------------------|-------------------|----------------------------------|-------------------------|--------------------------------------------------------------------------------------------|------------------------|
| Length               | $l$               | $m$               | 0.01                             | 1                       | $l^* = l_{\text{model}}/l_{\text{prototype}}$                                              | $10^{-5}$              |
| Density (sediments)  | $\rho$            | $kg \cdot m^{-3}$ | 1130                             | 2400                    | $\rho^* = \rho_{\text{model}}/\rho_{\text{prototype}}$                                     | 0.47                   |
| Gravity acceleration | $g$               | $m \cdot s^{-2}$  | 9.81                             | 9.81                    | $g^* = g_{\text{model}}/g_{\text{prototype}}$                                              | 1                      |
| Friction coefficient | $\mu$             | -                 | 0.55–0.75 <sup>#</sup>           | 0.40–0.80               | $\mu^* = \mu_{\text{model}}/\mu_{\text{prototype}}$                                        | 1                      |
| Cohesion             | $C$               | $Pa$              | 35–75 <sup>#</sup>               | $10^7$                  | $C^* = C_{\text{model}}/C_{\text{prototype}} = \rho_c^* l^* g^{*\$}$                       | $10^{-5}$              |
| Stress               | $\sigma$          | $Pa$              | 100                              | $21.30 \times 10^6$     | $\sigma^* = \rho_c^* l^* g^*$                                                              | $4.70 \times 10^{-6}$  |
| Viscosity            | $\eta$            | $Pa \cdot s$      | $2.00 \times 10^4$ <sup>##</sup> | $5.00 \times 10^{18}$   | $\eta^* = \eta_{\text{model}}/\eta_{\text{prototype}} = \nu^{*-1} \rho_v^* l^{*2} g^{*\$}$ | $4.00 \times 10^{-15}$ |
| Strain rate          | $d\varepsilon/dt$ | $s^{-1}$          | $10^{-2}$ – $10^{-7}$            | $10^{-11}$ – $10^{-16}$ | $(d\varepsilon/dt)^* = \sigma^*/\eta^*$                                                    | $1.18 \times 10^9$     |
| Time (submarine)     | $t$               | $hour$            | 1                                | $2.35 \times 10^9$      | $t^* = 1/(2 \cdot d\varepsilon/dt)^{*\$}$                                                  | $4.26 \times 10^{-10}$ |

<sup>#</sup>For static>reactivation>dynamic friction coefficients (Warsitzka et al., 2019)

<sup>##</sup>Rudolf et al. (2016)

<sup>\\$</sup> brittle regime scaling based on the ratio between lithostatic pressure and cohesion

<sup>\\$\\$</sup> viscous regime scaling based on the ratio between lithostatic pressure and viscous strength (Ramberg number),  $\nu$  is a characteristic velocity

<sup>\\$</sup> submarine systems at hydrostatic conditions deform at about half the rate of subaerial systems (Gemmer et al. 2005) because of the stabilizing effect of the water column and buoyancy. Since the experiment is conducted in sub -aerial environment, we here apply a generic correction factor of 1/2 following Adam et al. (2012a) which accounts for the reduction in effective density of water saturated sediments by the water density.

**Table 1.** Material properties and **scaling relationship** of the experiments in this study. Note geometric scaling of 1cm in model is 1 km in nature and time scaling of 1 hour in model is 0.268

5 Ma in nature.

## Appendix

| My | Time in Hr | Sedimentation thickness    | Basin 1a | Basin 1b | Basin 2a     | Basin 2b | Basin 3a       | Basin 3b |
|----|------------|----------------------------|----------|----------|--------------|----------|----------------|----------|
|    |            |                            | Model A  | Model B  | Model E      | Model D  | Model F        | Model C  |
| 0  | 0          | <b>Pre-kinematic</b>       | 1 mm     | 5 mm     | 1 mm with DF | 1 mm     | 0.5 mm with DF | 0.5 mm   |
| 1  | 4          |                            |          |          |              |          |                |          |
| 2  | 8          |                            |          |          |              |          |                |          |
| 3  | 12         | <b>Syn-sedimentation 1</b> | 1 mm     | 1 mm     | 1 mm with DF | 0        | 0.5 mm with DF | 0.5 mm   |
| 4  | 16         |                            |          |          |              |          |                |          |
| 5  | 20         |                            |          |          |              |          |                |          |
| 6  | 24         | <b>Syn-sedimentation 2</b> | 1 mm     | 1 mm     | 1 mm with DF | 0        | 0.5 mm with DF | 0.5 mm   |
| 7  | 28         |                            |          |          |              |          |                |          |
| 8  | 32         |                            |          |          |              |          |                |          |
| 9  | 36         | <b>Syn-sedimentation 3</b> | 1 mm     | 1 mm     | 1 mm with DF | 0.14 mm  | 0.5 mm with DF | 0.5 mm   |
| 10 | 40         |                            |          |          |              |          |                |          |
| 11 | 44         |                            |          |          |              |          |                |          |
| 12 | 48         | <b>Syn-sedimentation 4</b> | 1 mm     | 1 mm     | 1 mm         | 0.17 mm  | 0.5 mm         | 0.5 mm   |
| 13 | 52         |                            |          |          |              |          |                |          |
| 14 | 56         |                            |          |          |              |          |                |          |
| 15 | 60         | <b>Syn-sedimentation 5</b> | 1 mm     | 1 mm     | 1 mm         | 0.12 mm  | 0.5 mm         | 0.5 mm   |
| 16 | 64         |                            |          |          |              |          |                |          |
| 17 | 68         |                            |          |          |              |          |                |          |
| 18 | 72         | <b>Syn-sedimentation 6</b> | 1 mm     | 1 mm     | 1 mm         | 0.2 mm   | 0.5 mm         | 0.5 mm   |
| 19 | 76         |                            |          |          |              |          |                |          |
| 20 | 80         |                            |          |          |              |          |                |          |
| 21 | 84         | <b>Syn-sedimentation 7</b> | 1 mm     | 1 mm     | 1 mm         | 0.12 mm  | 0.5 mm         | 0.5 mm   |
| 22 | 88         |                            |          |          |              |          |                |          |
| 23 | 92         |                            |          |          |              |          |                |          |
| 24 | 96         | <b>Syn-sedimentation 8</b> | 1 mm     | 1 mm     | 1 mm         | 0.31 mm  | 0.5 mm         | 0.5 mm   |
| 25 | 100        |                            |          |          |              |          |                |          |
| 26 | 104        |                            |          |          |              |          |                |          |
| 27 | 108        | <b>Syn-sedimentation 9</b> | 1 mm     | 1 mm     | 1 mm         | 0.27 mm  | 0.5 mm         | 0.5 mm   |
| 28 | 112        |                            |          |          |              |          |                |          |
| 29 | 116        |                            |          |          |              |          |                |          |
| 30 | 120        | Stop                       | Stop     | Stop     | Stop         | Stop     | Stop           | Stop     |

**Table A1.** Sedimentation rates, pre- and syn-kinematic depositional scenarios for all six silicone basins of the three experiments. Note the labels of basins, such as Basin 1a and 1b, are for paired models. The labels of models are the names referred in the main text.

5
